# Supplementary material for: Hydrolysis of the damaged deoxythymidine glycol nucleoside and comparison to canonical DNA
Source: Royal Society of Chemistry journal article supplement (doi:10.1039/c3cp53217h), 2013-01-01
Supplement: c3cp53217h.pdf [file c3cp53217h.pdf]

# Hydrolysis of the Damaged Deoxythymidine Glycol Nucleoside and Comparison to Canonical DNA

Lex Navarro-Whyte, Jennifer L. Kellie, Stefan A. P. Lenz and Stacey D. Wetmore\*,<sup>1</sup>

*Department of Chemistry and Biochemistry, University of Lethbridge, 4401 University Drive, Lethbridge,  
Alberta, T1K 3M4, Canada*

## Supporting Information (10 Pages)

|                                                                                                                                                        |    |
|--------------------------------------------------------------------------------------------------------------------------------------------------------|----|
| Figure S1. B3LYP-D3 and M06-2X reaction potential energy surface for the hydrolysis of deoxythymidine (dT).....                                        | 2  |
| Figure S2. B3LYP-D3 and M06-2X reaction potential energy surface for the hydrolysis of deoxythymidine glycol (dTg).....                                | 3  |
| Table S1. Comparison of the Relative Potential Energy for the Deglycosylation of Deoxythymidine Glycol (dT) Calculated Using a Variety of Methods..... | 4  |
| Table S2. Cartesian coordinates for the optimized constrained dT stationary points.....                                                                | 5  |
| Table S3. Cartesian coordinates for the optimized constrained dTg stationary points.....                                                               | 10 |
| Full Citation for References 84 and 86. ....                                                                                                           | 13 |

---

<sup>1</sup> Corresponding author. E-mail: [stacey.wetmore@uleth.ca](mailto:stacey.wetmore@uleth.ca).

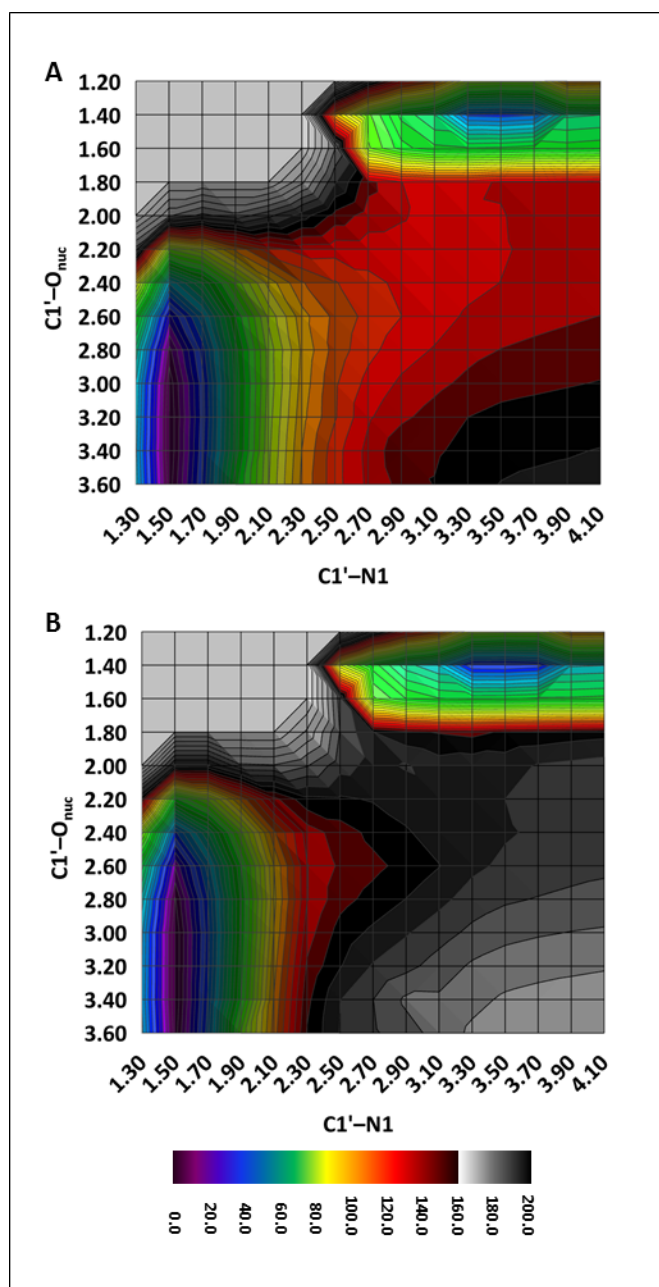

Figure S1. (A) B3LYP-D3 and (B) M06-2X reaction potential energy surface for the hydrolysis of deoxythymidine (dT)

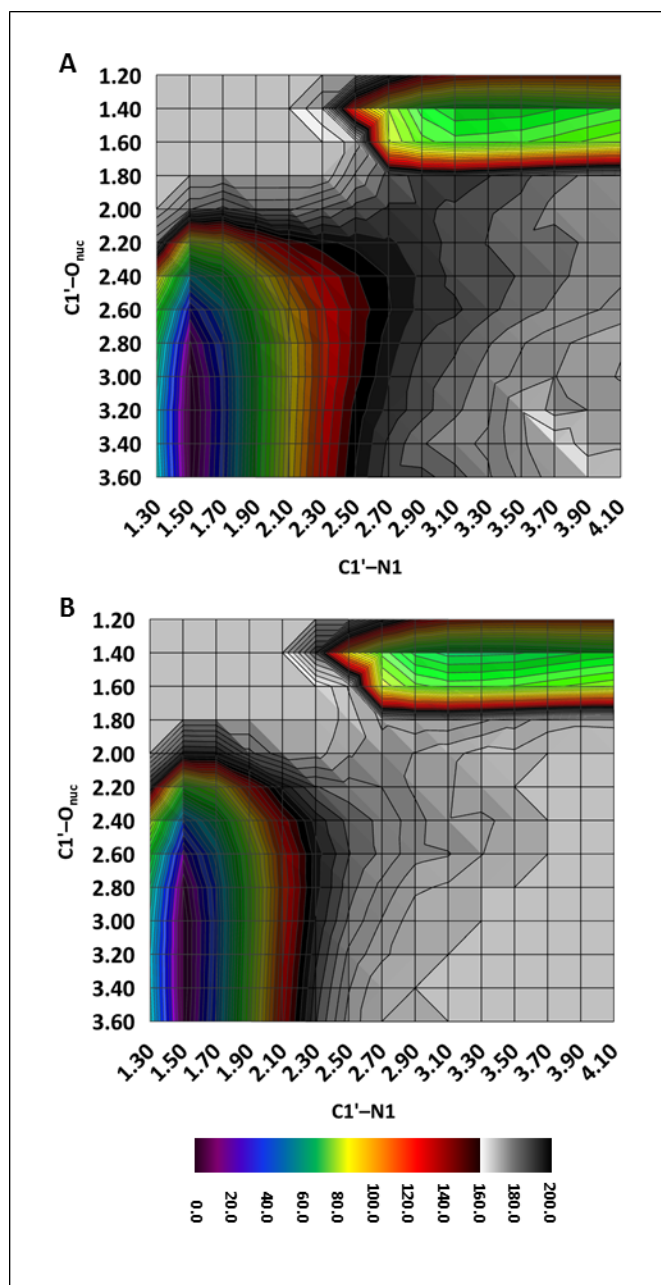

Figure S2. (A) B3LYP-D3 and (B) M06-2X reaction potential energy surface for the hydrolysis of deoxythymidine glycol (dTg)

Table S1. Comparison of the Relative Potential Energy for the Deglycosylation of Deoxythymidine Glycol (dT) Calculated Using a Variety of Methods.<sup>a</sup>

|                          | PCM-B3LYP/<br>6-31+G(d) | PCM-B3LYP/<br>6-311+G(2df,2p) | PCM-B3LYP-D3/<br>6-311+G(2df,2p) | PCM-M06-2X/<br>6-311+G(2df,2p) |
|--------------------------|-------------------------|-------------------------------|----------------------------------|--------------------------------|
| Relaxed <sup>b</sup>     |                         |                               |                                  |                                |
| RC                       | 0.0                     | 0.0                           | 0.0                              | 0.0                            |
| TSC                      | 163.3                   | 164.3                         | 171.1                            | 196.7                          |
| PC                       | 63.8                    | 64.1                          | 74.3                             | 69.2                           |
| Constrained <sup>c</sup> |                         |                               |                                  |                                |
| RC                       | 0.0                     | 0.0                           | 0.0                              | 0.0                            |
| TSC                      | 162.9                   | 164.5                         | 172.5                            | 196.8                          |
| PC                       | 66.5                    | 66.0                          | 76.3                             | 69.4                           |

<sup>a</sup>Relative energies were determined using PCM-B3LYP/6-31+G(d) geometries. <sup>b</sup>Geometries were fully optimized. <sup>c</sup>Relative energies on constrained geometries from the potential energy surface.

Table S2. Cartesian coordinates for the optimized constrained stationary points on the thymine potential energy surface.

A. Thymine reactant with constrained glycosidic bond (1.5 Å) and nucleophile distance (3.4 Å)

|   |             |             |             |
|---|-------------|-------------|-------------|
| H | -1.14888300 | -0.53128500 | -0.56291000 |
| H | -1.55628100 | 0.08888500  | 1.74286400  |
| H | -0.16481100 | 1.19433300  | 1.74935700  |
| H | -2.02812900 | 2.71499300  | -1.31726900 |
| H | -0.97223000 | 4.58118900  | -0.25028900 |
| H | 0.15961400  | 3.87385800  | -1.43248300 |
| H | 1.18144900  | 4.28192700  | 0.63475100  |
| O | 0.61480800  | 3.49716600  | 0.57050600  |
| C | -0.34560200 | 3.70626300  | -0.47232800 |
| O | -0.49094900 | 1.35420700  | -1.09458800 |
| C | -0.51376000 | 0.26690700  | -0.18075900 |
| H | 1.68406600  | 1.54717900  | 0.28258700  |
| H | 2.47833900  | -3.08704100 | -0.52868800 |
| C | 3.48865300  | -1.33413800 | -0.10543400 |
| O | 4.59690400  | -1.87736200 | -0.11874800 |
| N | 2.33895200  | -2.09687300 | -0.34764800 |
| C | 1.03124400  | -1.66725400 | -0.37739500 |
| O | 0.10053100  | -2.44915200 | -0.61759600 |
| N | 0.86479000  | -0.32169200 | -0.12462600 |
| C | 1.94689700  | 0.50573400  | 0.12147900  |
| C | 3.23409600  | 0.07634500  | 0.14581300  |
| C | -1.24480900 | 2.48457500  | -0.58634000 |
| C | -1.89607700 | 2.01642300  | 0.74071400  |
| C | -1.00891400 | 0.83077900  | 1.15605800  |
| H | -3.38865500 | 0.94034700  | -0.04461000 |
| O | -3.27197700 | 1.68602100  | 0.59331400  |
| H | -1.86767200 | 2.81125400  | 1.48891000  |
| O | -3.69357900 | -0.42283800 | -1.16717000 |
| H | -4.42024700 | -0.23576100 | -1.78240600 |
| H | -3.95787500 | -1.24212700 | -0.67323000 |
| O | -1.82999200 | -3.75213100 | 0.92397400  |
| H | -1.13225400 | -3.30412000 | 0.39487600  |
| H | -1.74875000 | -4.69695800 | 0.71763500  |
| O | -4.28067600 | -2.70133300 | 0.24912600  |
| H | -4.74204100 | -2.49672000 | 1.07791400  |
| H | -3.41562600 | -3.10561400 | 0.51563700  |
| C | 4.39792200  | 0.98925300  | 0.41374800  |
| H | 5.10015500  | 0.98996300  | -0.42845600 |
| H | 4.05687200  | 2.01519000  | 0.57923100  |
| H | 4.95832000  | 0.66451000  | 1.29860400  |

B. Thymine dissociative transition state with constrained glycosidic bond (2.9 Å) and nucleophile distance (2.8 Å)

|   |             |             |             |
|---|-------------|-------------|-------------|
| H | 0.66126900  | 0.59095900  | -0.74806000 |
| H | 1.75277600  | 0.47346900  | 1.67312300  |
| H | 0.95086000  | -1.08377100 | 1.41785100  |
| H | 4.02014900  | -1.47045800 | -1.04617600 |
| H | 3.48917200  | -3.74671000 | -0.37238700 |
| H | 2.52121800  | -3.30412300 | -1.80025200 |
| H | 1.17244700  | -4.25530900 | -0.14827100 |
| O | 1.46884500  | -3.34465300 | 0.00728100  |
| C | 2.66595800  | -3.11289700 | -0.72964100 |
| O | 2.07340400  | -0.78589300 | -1.21022200 |
| C | 1.40430000  | -0.11455600 | -0.36535700 |
| H | -2.01915800 | -2.50551200 | 0.16371900  |

|   |             |             |             |
|---|-------------|-------------|-------------|
| H | -3.41138300 | 1.97152000  | -0.54029200 |
| C | -4.13691500 | 0.15270100  | 0.10982400  |
| O | -5.28324500 | 0.60141600  | 0.31996800  |
| N | -3.14273200 | 1.00562800  | -0.37702300 |
| C | -1.83072400 | 0.65071200  | -0.66057200 |
| O | -1.03848500 | 1.54425100  | -1.09584100 |
| N | -1.44903800 | -0.62330800 | -0.46348900 |
| C | -2.38058200 | -1.48740400 | 0.01558500  |
| C | -3.69522700 | -1.20241500 | 0.31842900  |
| C | 3.08489500  | -1.67362300 | -0.52289800 |
| C | 3.09950300  | -1.14394400 | 0.93114300  |
| C | 1.73854200  | -0.41772100 | 1.04019000  |
| H | 4.05956300  | 0.55923800  | 0.71387200  |
| O | 4.19839600  | -0.29371700 | 1.18964100  |
| H | 3.17038300  | -1.97357900 | 1.63497600  |
| O | 3.34660900  | 1.89945500  | -0.25955100 |
| H | 3.75797200  | 2.13241100  | -1.10700000 |
| H | 2.92197400  | 2.73162000  | 0.08491900  |
| O | -0.54989900 | 4.00333400  | -0.06070800 |
| H | -0.78547300 | 3.12158200  | -0.45610600 |
| H | -0.78167300 | 4.66533800  | -0.73117600 |
| O | 2.09072000  | 4.13361800  | 0.64710600  |
| H | 2.12229700  | 4.22836300  | 1.61223500  |
| H | 1.12677200  | 4.09342300  | 0.40779600  |
| C | -4.66263600 | -2.22865800 | 0.84281000  |
| H | -5.52778500 | -2.34840500 | 0.17756100  |
| H | -4.17436300 | -3.20429200 | 0.94096700  |
| H | -5.05807400 | -1.94766500 | 1.82781200  |

C. Thymine intermediate complex with constrained glycosidic bond (2.9 Å) and nucleophile distance (2.8 Å)

|   |             |             |             |
|---|-------------|-------------|-------------|
| H | -0.38531600 | 0.00862000  | 0.01557100  |
| H | -2.47166100 | 1.52967300  | -0.76783300 |
| H | -2.38864800 | 0.11921200  | -1.83475400 |
| H | -3.69460400 | -1.74349500 | 1.34599600  |
| H | -4.57408400 | -2.97681100 | -0.56808400 |
| H | -2.96221900 | -3.59556700 | -0.12995000 |
| H | -3.08653100 | -3.19590600 | -2.42234200 |
| O | -3.01909200 | -2.41272400 | -1.85358600 |
| C | -3.50160900 | -2.73880600 | -0.55263200 |
| O | -1.83554900 | -1.31607900 | 0.52908400  |
| C | -1.46224000 | -0.22524700 | -0.01479300 |
| H | 1.55418100  | -1.35683600 | 1.47996400  |
| H | 4.29294200  | 0.97074300  | -1.60344800 |
| C | 4.39217600  | -0.52953200 | -0.19150300 |
| O | 5.61151000  | -0.72897200 | -0.37763100 |
| N | 3.73371600  | 0.45207000  | -0.93293000 |
| C | 2.38697800  | 0.79216300  | -0.84158900 |
| O | 1.96479300  | 1.71503200  | -1.59564400 |
| N | 1.61794400  | 0.12053800  | 0.03909500  |
| C | 2.21970300  | -0.84438400 | 0.78370400  |
| C | 3.54393400  | -1.22412100 | 0.74249500  |
| C | -3.31796000 | -1.53293700 | 0.34421100  |
| C | -3.81442700 | -0.16995300 | -0.19227800 |
| C | -2.52876600 | 0.44017600  | -0.79110200 |
| H | -3.65357700 | 0.93758000  | 1.41565500  |
| O | -4.37936900 | 0.63689300  | 0.82549200  |
| H | -4.58876300 | -0.31258800 | -0.94631100 |
| O | -1.84755200 | 1.18929700  | 1.88537200  |
| H | -1.44506400 | 0.79712300  | 2.67795600  |

|   |             |             |             |
|---|-------------|-------------|-------------|
| H | -1.43360400 | 2.09405500  | 1.77237400  |
| O | -0.29161300 | 3.12234800  | -1.26561100 |
| H | 0.52965900  | 2.55761000  | -1.36749600 |
| H | -0.12857000 | 3.91805100  | -1.79627600 |
| O | -0.72668600 | 3.57579600  | 1.37541900  |
| H | -1.34516700 | 4.31582600  | 1.48388100  |
| H | -0.55203000 | 3.50189200  | 0.39710900  |
| C | 4.12120500  | -2.30789900 | 1.61225200  |
| H | 4.92408800  | -1.92738700 | 2.25743900  |
| H | 3.34692000  | -2.73868800 | 2.25650500  |
| H | 4.55491700  | -3.12085300 | 1.01514700  |

D. Thymine associative transition state with constrained glycosidic bond (3.3 Å) and nucleophile distance (2.0 Å)

|   |             |             |             |
|---|-------------|-------------|-------------|
| H | -0.50540900 | 0.19691900  | 0.10505100  |
| H | -2.71487300 | 1.56281500  | -0.78800300 |
| H | -2.35126200 | 0.15477700  | -1.80775400 |
| H | -3.73039300 | -1.83266400 | 1.23365400  |
| H | -4.36988800 | -3.12360100 | -0.71901700 |
| H | -2.73765400 | -3.60364300 | -0.19154400 |
| H | -2.81208500 | -3.20157600 | -2.49902800 |
| O | -2.80196500 | -2.42511000 | -1.91735200 |
| C | -3.32487300 | -2.79376900 | -0.64267300 |
| O | -1.86098200 | -1.24729100 | 0.54635200  |
| C | -1.56872100 | -0.06183300 | 0.11108100  |
| H | 1.48997700  | -1.20441800 | 1.52962200  |
| H | 4.43469000  | 0.92066800  | -1.50768000 |
| C | 4.37233900  | -0.65491500 | -0.17789900 |
| O | 5.55241500  | -0.99671500 | -0.40902200 |
| N | 3.82900100  | 0.44138900  | -0.84831000 |
| C | 2.53750800  | 0.94153400  | -0.70269700 |
| O | 2.22183000  | 1.94891300  | -1.39982800 |
| N | 1.70769600  | 0.32840800  | 0.16402700  |
| C | 2.19869000  | -0.74273300 | 0.84043500  |
| C | 3.46240600  | -1.28596600 | 0.74174700  |
| C | -3.29288400 | -1.58210900 | 0.26558300  |
| C | -3.88112500 | -0.27049900 | -0.30556900 |
| C | -2.62426200 | 0.47611400  | -0.79353600 |
| H | -3.98782300 | 0.80743300  | 1.33047800  |
| O | -4.61544300 | 0.46265700  | 0.66616600  |
| H | -4.57545100 | -0.47852400 | -1.11960900 |
| O | -1.97823000 | 1.07730400  | 1.70314500  |
| H | -1.52031300 | 0.67775900  | 2.46536000  |
| H | -1.59669700 | 2.01833700  | 1.59342200  |
| O | 0.03528200  | 3.45844000  | -1.12231200 |
| H | 0.83024800  | 2.84945200  | -1.18759900 |
| H | 0.34665700  | 4.32688900  | -1.42266000 |
| O | -0.99253800 | 3.47169800  | 1.36344100  |
| H | -1.68216000 | 4.15395700  | 1.40334500  |
| H | -0.59969400 | 3.52344400  | 0.44412100  |
| C | 3.91204500  | -2.48188500 | 1.53682900  |
| H | 4.77402600  | -2.24649700 | 2.17506600  |
| H | 3.10308600  | -2.84142700 | 2.18221600  |
| H | 4.21844800  | -3.31149600 | 0.88602000  |

E. Thymine product with constrained glycosidic bond (3.5 Å) and nucleophile distance (1.4 Å)

|   |             |            |             |
|---|-------------|------------|-------------|
| H | -1.47897000 | 0.88009800 | -1.66759400 |
| H | -3.44000400 | 1.94642600 | -0.02684200 |

|   |             |             |             |
|---|-------------|-------------|-------------|
| H | -3.88833700 | 0.72233700  | -1.24344400 |
| H | -2.25122600 | -1.75923200 | 1.18338500  |
| H | -4.16363400 | -2.94459400 | 0.40235000  |
| H | -2.82588900 | -3.20764300 | -0.74515400 |
| H | -4.82855800 | -2.66878500 | -1.82574900 |
| O | -4.33945100 | -1.93673500 | -1.41887800 |
| C | -3.53407200 | -2.46216700 | -0.35889900 |
| O | -1.75192700 | -0.82806800 | -0.61032200 |
| C | -1.81969900 | 0.59412200  | -0.66748500 |
| H | 0.54440300  | -1.47209300 | 0.07080300  |
| H | 4.85519400  | 0.51200200  | -0.10048900 |
| C | 3.95278600  | -1.34128900 | 0.14053400  |
| O | 5.03010600  | -1.94242500 | 0.24590400  |
| N | 3.95127600  | 0.04971400  | -0.04726500 |
| C | 2.82788300  | 0.80812400  | -0.17038600 |
| O | 3.07324100  | 2.09321500  | -0.33869800 |
| N | 1.62327800  | 0.28560600  | -0.11910400 |
| C | 1.55779000  | -1.07893200 | 0.05113100  |
| C | 2.62726900  | -1.92278300 | 0.18331500  |
| C | -2.75704900 | -1.33762800 | 0.30609100  |
| C | -3.59940300 | -0.11111400 | 0.73818000  |
| C | -3.27922000 | 0.91691500  | -0.35652100 |
| H | -2.32146900 | 0.68488800  | 1.99057600  |
| O | -3.23700600 | 0.35345100  | 2.04619700  |
| H | -4.66221800 | -0.34989100 | 0.79727800  |
| O | -1.00969800 | 1.17719400  | 0.31431200  |
| H | -0.05363800 | 0.95687600  | 0.13404700  |
| H | -1.04901300 | 2.95076100  | 0.66782800  |
| O | 1.22965600  | 3.82559400  | -0.99628100 |
| H | 2.25612000  | 2.65960100  | -0.54016900 |
| H | 1.70373700  | 4.66981300  | -1.07019100 |
| O | -0.80866600 | 3.89952200  | 0.79663500  |
| H | -1.58198400 | 4.41471300  | 0.51597100  |
| H | 0.49423100  | 3.97342300  | -0.34266100 |
| C | 2.49051800  | -3.40802000 | 0.36805200  |
| H | 2.94723700  | -3.73448300 | 1.31050600  |
| H | 1.43671100  | -3.70249000 | 0.37648900  |
| H | 2.99456100  | -3.95631000 | -0.43736800 |

F. Thymine concerted transition state with constrained glycosidic bond (2.7 Å) and nucleophile distance (2.2 Å)

|   |             |             |             |
|---|-------------|-------------|-------------|
| H | -1.05589400 | 0.70333800  | 1.10534200  |
| H | -2.24431400 | 0.65124600  | -1.31619900 |
| H | -0.73891200 | -0.28204900 | -1.41440800 |
| H | -2.82282700 | -2.78022000 | 0.75413700  |
| H | -1.40973400 | -4.23805800 | -0.52136300 |
| H | -0.51062400 | -3.70835200 | 0.92094100  |
| H | 0.79371100  | -3.47428100 | -0.99542600 |
| O | 0.08649300  | -2.82089700 | -0.87700100 |
| C | -0.92332400 | -3.37782600 | -0.04066900 |
| O | -1.45475700 | -1.27656600 | 1.12132900  |
| C | -1.43896800 | -0.13069400 | 0.54257700  |
| H | 1.64969600  | -0.99768000 | 1.77041600  |
| H | 3.24779200  | 1.97765100  | -1.55118000 |
| C | 3.88608100  | 0.42092200  | -0.35681300 |
| O | 5.04888100  | 0.44526900  | -0.81374500 |
| N | 2.93709800  | 1.32293400  | -0.83967100 |
| C | 1.61037000  | 1.42266100  | -0.42923900 |
| O | 0.89179700  | 2.30995100  | -0.97326300 |
| N | 1.16928300  | 0.56658200  | 0.51367100  |
| C | 2.05994300  | -0.32910000 | 1.01245100  |
| C | 3.38448300  | -0.46946000 | 0.65804300  |



|   |             |             |             |
|---|-------------|-------------|-------------|
| C | -1.99367500 | -2.33566600 | 0.20093900  |
| C | -2.49138000 | -1.54139800 | -1.03044000 |
| C | -1.71295200 | -0.21333500 | -0.91627600 |
| H | -4.11424700 | -0.73035900 | -0.30115400 |
| O | -3.89880100 | -1.35853800 | -1.02157500 |
| H | -2.25427600 | -2.07247400 | -1.95221300 |
| O | -3.48088500 | 0.53580600  | 1.01835900  |
| H | -3.64867500 | 0.42318000  | 1.96988500  |
| H | -3.55760500 | 1.52066500  | 0.82744700  |
| O | -0.95293700 | 3.91220000  | 0.14979600  |
| H | -0.29024900 | 3.25938400  | -0.21324900 |
| H | -0.57790100 | 4.23660400  | 0.98350700  |
| O | -3.53348900 | 3.13772000  | 0.45697500  |
| H | -4.00682800 | 3.34334000  | -0.36489900 |
| H | -2.59018600 | 3.42518800  | 0.31385800  |
| C | 4.30208600  | -1.49183100 | 1.27204500  |
| H | 5.16454400  | -1.02162300 | 1.76270600  |
| H | 3.77006800  | -2.08633800 | 2.02284000  |
| H | 4.70539100  | -2.18097900 | 0.51830100  |

Table S3. Cartesian coordinates for the optimized constrained stationary points on the thymine glycol potential energy surface.

A. Thymine glycol reactant with constrained glycosidic bond (1.5 Å) and nucleophile distance (3.4 Å)

|   |             |             |             |
|---|-------------|-------------|-------------|
| H | 1.29497400  | -0.53128100 | 0.82036800  |
| H | 2.02641000  | -0.23221300 | -1.45580100 |
| H | 0.64048500  | 0.81126900  | -1.82529900 |
| H | 2.08811700  | 2.86618700  | 1.16826200  |
| H | 1.13341700  | 4.48728600  | -0.28255100 |
| H | -0.13430600 | 3.92216500  | 0.83644200  |
| H | -0.74847100 | 4.05635000  | -1.48383400 |
| O | -0.31492400 | 3.25989100  | -1.13714200 |
| C | 0.50196900  | 3.63346100  | -0.00898000 |
| O | 0.64341700  | 1.40988300  | 1.01322100  |
| C | 0.72244800  | 0.21097800  | 0.26027600  |
| H | -1.58832200 | 1.32689100  | 0.90364800  |
| H | -2.12200000 | -3.02764700 | -0.94601200 |
| C | -3.25895300 | -1.48660800 | -0.19371600 |
| O | -4.33706200 | -1.97515300 | -0.49570100 |
| N | -2.07032700 | -2.11160900 | -0.50888700 |
| C | -0.77407800 | -1.62247700 | -0.31391900 |
| O | 0.18632100  | -2.36559500 | -0.55024400 |
| N | -0.66461300 | -0.34569400 | 0.13308600  |
| C | -1.81756900 | 0.55044700  | 0.17464200  |
| C | -3.09268400 | -0.19360300 | 0.62858600  |
| C | 1.40718500  | 2.48070500  | 0.40155300  |
| C | 2.22142300  | 1.83114400  | -0.74196600 |
| C | 1.39844200  | 0.57514800  | -1.07368800 |
| H | 3.60006900  | 0.91510100  | 0.37991800  |
| O | 3.56730300  | 1.55891600  | -0.36905300 |
| H | 2.28816300  | 2.50028400  | -1.60249800 |
| O | 3.75922400  | -0.28006200 | 1.70833300  |
| H | 4.37132600  | 0.02093900  | 2.39850600  |
| H | 4.14546700  | -1.12087100 | 1.34935300  |
| O | 2.75209300  | -3.25907100 | -1.23053700 |
| H | 1.87087900  | -2.91490000 | -0.96991100 |
| H | 2.63111300  | -4.21358500 | -1.35743500 |
| O | 4.69066200  | -2.62123600 | 0.61221900  |
| H | 5.51375300  | -2.48170100 | 0.11742300  |
| H | 4.01304400  | -2.87967300 | -0.06348200 |
| C | -3.03736000 | -0.57184600 | 2.11507500  |
| H | -2.92465900 | 0.33809900  | 2.71254100  |
| H | -3.97075800 | -1.06644400 | 2.39956700  |
| H | -2.20300900 | -1.24347600 | 2.33427500  |
| O | -4.20436000 | 0.66051100  | 0.44899700  |
| H | -4.07051500 | 1.12172600  | -0.40124000 |
| O | -2.09380500 | 1.13283600  | -1.08913700 |
| H | -1.52649700 | 1.93514700  | -1.17644500 |

B. Thymine Glycol concerted transition state with constrained glycosidic bond (3.1 Å) and nucleophile distance (2.0 Å)

|   |             |             |             |
|---|-------------|-------------|-------------|
| H | -1.06147000 | 0.76323100  | 0.43660100  |
| H | -3.00838400 | 0.75807400  | -1.51131000 |
| H | -1.77902000 | -0.49873500 | -1.75151700 |
| H | -3.61428300 | -2.18035700 | 1.24957600  |
| H | -2.78694300 | -3.99161200 | -0.20197700 |
| H | -1.59382400 | -3.57181600 | 1.05277600  |
| H | -0.81374900 | -3.73017600 | -1.27293600 |
| O | -1.12863400 | -2.90468200 | -0.87049200 |

|   |             |             |             |
|---|-------------|-------------|-------------|
| C | -2.09327000 | -3.21643300 | 0.14359000  |
| O | -1.95394200 | -0.95440500 | 1.00792600  |
| C | -1.90145200 | 0.09605800  | 0.24649400  |
| H | 1.24494600  | -1.09562000 | 1.38053600  |
| H | 3.56985300  | 1.65966300  | -1.70183000 |
| C | 3.88921100  | 0.00992100  | -0.53668800 |
| O | 4.99604800  | -0.27187300 | -0.99774800 |
| N | 3.15066200  | 1.05850500  | -0.99864300 |
| C | 1.84048500  | 1.43217100  | -0.54386200 |
| O | 1.46449200  | 2.57013800  | -0.96180900 |
| N | 1.15353400  | 0.62218300  | 0.23062800  |
| C | 1.70229900  | -0.68693600 | 0.47121600  |
| C | 3.23902300  | -0.73157800 | 0.65062200  |
| C | -2.89782500 | -1.97004200 | 0.45339100  |
| C | -3.56876300 | -1.25022000 | -0.74075300 |
| C | -2.55993100 | -0.13397800 | -1.07180000 |
| H | -4.74346300 | 0.00515300  | 0.20450000  |
| O | -4.85584900 | -0.74544500 | -0.41006200 |
| H | -3.71441900 | -1.93492600 | -1.57656400 |
| O | -3.31560700 | 1.26336800  | 1.04496300  |
| H | -3.17487500 | 1.26179700  | 2.00963900  |
| H | -3.18736100 | 2.22787400  | 0.73376100  |
| O | -0.32253900 | 4.25885000  | 0.06188100  |
| H | 0.30776200  | 3.55586000  | -0.27747600 |
| H | 0.03217800  | 4.54542200  | 0.91803800  |
| O | -2.94753500 | 3.71817600  | 0.24886000  |
| H | -3.35596600 | 3.90669700  | -0.61143500 |
| H | -1.97053900 | 3.90727200  | 0.14636000  |
| C | 3.68451900  | -0.05842300 | 1.95381900  |
| H | 3.21116700  | -0.56380500 | 2.80248800  |
| H | 4.77116800  | -0.13974900 | 2.06002500  |
| H | 3.40673000  | 0.99891000  | 1.97601100  |
| O | 3.67728300  | -2.08337300 | 0.70264100  |
| H | 3.12735400  | -2.56067900 | 0.05160000  |
| O | 1.44503600  | -1.61082200 | -0.61764200 |
| H | 0.52796500  | -1.94998600 | -0.56508700 |

### C. Thymine Glycol product with constrained glycosidic bond (3.5 Å) and nucleophile distance (1.4 Å)

|   |             |             |             |
|---|-------------|-------------|-------------|
| H | -1.19062400 | 0.87052500  | 0.34939900  |
| H | -3.14465800 | 0.79638200  | -1.62196700 |
| H | -1.81329700 | -0.38557300 | -1.65383700 |
| H | -3.75221600 | -2.01938800 | 1.25498700  |
| H | -2.91688600 | -3.87567700 | -0.05769500 |
| H | -1.72689100 | -3.42091100 | 1.18997600  |
| H | -0.84760600 | -3.73567400 | -1.01950700 |
| O | -1.22452500 | -2.87905500 | -0.76182100 |
| C | -2.21223400 | -3.09761500 | 0.26059500  |
| O | -2.06318700 | -0.81590700 | 1.04279400  |
| C | -2.17564300 | 0.39783800  | 0.31563000  |
| H | 1.04376500  | -1.00883500 | 1.30482800  |
| H | 3.88328100  | 1.57143600  | -1.51695100 |
| C | 3.85598300  | -0.25666900 | -0.56131900 |
| O | 4.86650800  | -0.69673200 | -1.09327400 |
| N | 3.35570200  | 0.98673500  | -0.87483400 |
| C | 2.15703600  | 1.48096200  | -0.35303900 |
| O | 2.02049600  | 2.77397300  | -0.63815400 |
| N | 1.30170400  | 0.79537200  | 0.31105500  |
| C | 1.56520000  | -0.63303800 | 0.41942000  |
| C | 3.07046600  | -0.98231300 | 0.55377700  |
| C | -2.97785900 | -1.80957300 | 0.50772900  |
| C | -3.62620900 | -1.16301900 | -0.74342500 |

|   |             |             |             |
|---|-------------|-------------|-------------|
| C | -2.66065900 | -0.01440000 | -1.07133200 |
| H | -4.89222600 | 0.03744700  | 0.15413400  |
| O | -4.95731400 | -0.70141800 | -0.47818400 |
| H | -3.72505200 | -1.87783100 | -1.56185900 |
| O | -3.14873600 | 1.22820400  | 0.88447300  |
| H | -2.95655800 | 1.33730700  | 1.83316000  |
| H | -2.96502500 | 2.95732100  | 0.23198900  |
| O | 0.00256800  | 4.21620800  | 0.30212400  |
| H | 1.17406600  | 3.15990600  | -0.25698000 |
| H | 0.10265200  | 4.39949800  | 1.24991600  |
| O | -2.70775700 | 3.87102800  | -0.02596300 |
| H | -3.00923500 | 3.98358800  | -0.94181500 |
| H | -0.96621500 | 4.05907500  | 0.15900300  |
| C | 3.64342700  | -0.55220800 | 1.91016000  |
| H | 3.09061200  | -1.05720200 | 2.70904000  |
| H | 4.69692200  | -0.84156300 | 1.97528400  |
| H | 3.56611300  | 0.52830100  | 2.05995700  |
| O | 3.24084900  | -2.38435500 | 0.44651800  |
| H | 2.63457400  | -2.67301700 | -0.26304600 |
| O | 1.10241100  | -1.33109000 | -0.73879400 |
| H | 0.22512700  | -1.74653100 | -0.57847400 |

## Full citations for References 84 and 86

Frisch, M. J. T., G. W.; Schlegel, H. B. Scuseria, G. E.; Robb, M. A.; Cheeseman, J. R.; Scalmani, G.; Barone, V.; Mennucci, B.; Petersson, G. A.; Nakatsuji, H.; Caricato, M.; Li, X.; Hratchian, H. P.; Izmaylov, A. F.; Bloino, J.; Zheng, G.; Sonnenberg, J. L.; Hada, M.; Ehara, M.; Toyota, K.; Fukuda, R.; Hasegawa, J.; Ishida, M.; Nakajima, T.; Honda, Y.; Kitao, O.; Nakai, H.; Vreven, T.; Montgomery, Jr., J. A.; Peralta, J. E.; Ogliaro, F.; Bearpark, M.; Heyd, J. J.; Brothers, E.; Kudin, K. N.; Staroverov, V. N.; Kobayashi, R.; Normand, J.; Raghavachari, K.; Rendell, A.; Burant, J. C.; Iyengar, S. S.; Tomasi, J.; Cossi, M.; Rega, N.; Millam, N. J.; Klene, M.; Knox, J. E.; Cross, J. B.; Bakken, V.; Adamo, C.; Jaramillo, J.; Gomperts, R.; Stratmann, R. E.; Yazyev, O.; Austin, A. J.; Cammi, R.; Pomelli, C.; Ochterski, J. W.; Martin, R. L.; Morokuma, K.; Zakrzewski, V. G.; Voth, G. A.; Salvador, P.; Dannenberg, J. J.; Dapprich, S.; Daniels, A. D.; Farkas, Ö.; Foresman, J. B.; Ortiz, J. V.; Cioslowski, J.; Fox, D. J.; Revisions A.02, C.01 and D.01; Gaussian, Inc.: Wallingford CT, 2009.

Frisch, M. J.; Trucks, G. W.; Schlegel, H. B.; Scuseria, G. E.; Robb, M. A.; Cheeseman, J. R.; Montgomery, J., J. A.; Vreven, T.; Kudin, K. N.; Burant, J. C.; Millam, J. M.; Iyengar, S. S.; Tomasi, J.; Barone, V.; Mennucci, B.; Cossi, M.; Scalmani, G.; Rega, N.; Petersson, G. A.; Nakatsuji, H.; Hada, M.; Ehara, M.; Toyota, K.; Fukuda, R.; Hasegawa, J.; Ishida, M.; Nakajima, T.; Honda, Y.; Kitao, O.; Nakai, H.; Klene, M.; Li, X.; Knox, J. E.; Hratchian, H. P.; Cross, J. B.; Bakken, V.; Adamo, C.; Jaramillo, J.; Gomperts, R.; Stratmann, R. E.; Yazyev, O.; Austin, A. J.; Cammi, R.; Pomelli, C.; Ochterski, J. W.; Ayala, P. Y.; Morokuma, K.; Voth, G. A.; Salvador, P.; Dannenberg, J. J.; Zakrzewski, V. G.; Dapprich, S.; Daniels, A. D.; Strain, M. C.; Farkas, O.; Malick, D. K.; Rabuck, A. D.; Raghavachari, K.; Foresman, J. B.; Ortiz, J. V.; Cui, Q.; Baboul, A. G.; Clifford, S.; Cioslowski, J.; Stefanov, B. B.; Liu, G.; Liashenko, A.; Piskorz, P.; Komaromi, I.; Martin, R. L.; Fox, D. J.; Keith, T.; Al-Laham, M. A.; Peng, C. Y.; Nanayakkara, A.; Challacombe, M.; Gill, P. M. W.; Johnson, B.; Chen, W.; Wong, M. W.; Gonzalez, C.; Pople, J. A.; Revision D.02 ed.; Gaussian, Inc.: Wallingford CT, 2004.
